# Supplementary material for: Fostering Responsible Innovation through Stakeholder Engagement: Case Study of North Carolina Sweetpotato Stakeholders
Source: MDPI journal article supplement (doi:10.3390/su14042274), 2022-02-17
Supplement: s1 [file s1]

Archive with 1 entries (1 files):
- sustainability-1530410-supplementary.pdf
